# Supplementary material for: Emerging depression in adolescence coincides with accelerated frontal cortical thinning
Source: PubMed Central journal article supplement — J Child Psychol Psychiatry. 2018 Mar 25;59(9):994–1002. doi: 10.1111/jcpp.12895 (PMC6120477; doi:10.1111/jcpp.12895), 2018-03-25
Supplement: JCPP-59-994-s001.pdf [file JCPP-59-994-s001.pdf]

– Supplement –

Bos, M.G.N., Peters, S., van de Kamp, F.C., Crone, E.A., & Tamnes, C.K. *Emerging depression in adolescence coincides with accelerated cortical thinning.*

---

## Supplementary Methods

### *Image analysis*

Whole-brain volumetric segmentation and cortical surface reconstruction was performed using FreeSurfer 5.3, a well-validated and widely used software suite which is documented and freely available online (<http://surfer.nmr.mgh.harvard.edu/>). The technical details and specific processing steps are described in detail elsewhere (Dale, Fischl, & Sereno, 1999; Fischl et al., 2002; Fischl, Sereno, & Dale, 1999). After standard processing, the images were processed using FreeSurfer 5.3's longitudinal stream (Reuter, Schmansky, Rosas, & Fischl, 2012). This includes the creation of an unbiased within-subject template space and image ("base") using robust, inverse consistent registration (Reuter, Rosas, & Fischl, 2010). Several processing steps, such as skull stripping, Talairach transforms, atlas registration, as well as spherical surface maps and parcellations are then initialized with common information from the within-subject template, significantly increasing reliability and statistical power (Reuter et al., 2012).

### *Regions of interest.*

The five lobes were derived by combining the following cortical regions from the DKT atlas: frontal lobe: superior frontal, rostral and caudal middle frontal, lateral and medial orbitofrontal, pars orbitalis, pars triangularis, pars opercularis, precentral and paracentral; temporal lobe: superior, middle and inferior temporal, transverse temporal, insula, fusiform, parahippocampal and entorhinal; parietal lobe: superior and inferior parietal, supramarginal, postcentral and precuneus; occipital lobe: lateral occipital, cuneus, pericalcarine and lingual; cingulate: rostral and caudal anterior, posterior and isthmus cingulate.

### *Mixed model-fitting procedure*

All mixed models followed a formal model-fitting procedure. That is, we started with an unconditional means model that only included a fixed and random intercept, to allow for individual differences in intercept. We compared the unconditional means model with different growth models (i.e., linear, quadratic, or cubic) that tested the grand mean of age using the polynomial function. We added a random slope to the best fitting age model; however this did not improve model fit. Preferred models had lower Bayesian Information Criterion (BIC; Schwarz, 1978) values. Thereafter, we added sex, depression and the interaction between depression and age to the best fitting age.

– Supplement –

Bos, M.G.N., Peters, S., van de Kamp, F.C., Crone, E.A., & Tamnes, C.K. *Emerging depression in adolescence coincides with accelerated cortical thinning.*

---

**Supplementary Results**

We tested whether the current subsample (n=205) differed from the original sample (n=299). Gender distribution did not differ between included (109/96 female/male) and non-included group (44/50 female/male),  $\chi^2 = 0.31$ ,  $p = .19$ . Furthermore, the included (M=110, SD=9.76) and non-included group (M=108, SD = 13.40) did not differ on IQ estimate at TP1,  $t_{296} = -1.23$ ,  $p = .28$ . Yet, our sample was significantly younger (M=13.55, SD=2.50) at TP1 than the participants that were not included (M=14.94, SD=5.32),  $t_{297} = 2.41$ ,  $p = .18$ .

**Supplementary Table 1.** BIC values for null, linear, quadratic and cubic age models to describe the relationship with age and brain measures reported in the table.

|                           | Models     |                  |              |             |              |
|---------------------------|------------|------------------|--------------|-------------|--------------|
|                           | Null model | Random Intercept | Linear       | Quadratic   | Cubic        |
| <b>Cortical Thickness</b> |            |                  |              |             |              |
| Temporal                  | -780       | -897             | -1287        | -1300       | <b>-1302</b> |
| Frontal                   | -631       | -794             | -1187        | -1198       | <b>-1206</b> |
| Parietal                  | -718       | -867             | -1281        | -1304       | <b>-1304</b> |
| Occipital                 | -855       | -1184            | <b>-1432</b> | -1429       | -1423        |
| Cingulate                 | -587       | -764             | -1384        | -1401       | <b>-1409</b> |
| <b>Surface area</b>       |            |                  |              |             |              |
| Temporal                  | 10074      | 9053             | 8715         | 8720        | <b>8683</b>  |
| Frontal                   | 10666      | 9585             | 9174         | 9170        | <b>9118</b>  |
| Parietal                  | 10312      | 9475             | 8943         | 8909        | <b>8884</b>  |
| Occipital                 | 9689       | 8815             | 8586         | 8577        | <b>8566</b>  |
| Cingulate                 | 8818       | 7526             | 7249         | 7246        | <b>7240</b>  |
| <b>Subcortical volume</b> |            |                  |              |             |              |
| Hippocampus               | 8001       | <b>7352</b>      | 7357         | 7362        | 7364         |
| Amygdala                  | 6971       | 6184             | 6186         | <b>6185</b> | 6192         |

– Supplement –

Bos, M.G.N., Peters, S., van de Kamp, F.C., Crone, E.A., & Tamnes, C.K. *Emerging depression in adolescence coincides with accelerated cortical thinning.*

**Supplementary Table 2.** Model parameters for the best fitting model for the five lobes of cortical thickness. CI = confidence interval.

| <b>Factors</b>                      | <b>Cortical Thickness</b> |          |               |              |
|-------------------------------------|---------------------------|----------|---------------|--------------|
|                                     | <b>B</b>                  | <b>p</b> | <b>95% CI</b> |              |
|                                     |                           |          | <b>lower</b>  | <b>upper</b> |
| <b>Temporal</b>                     |                           |          |               |              |
| Intercept                           | 2.945                     | <.001    | 2.896         | 2.995        |
| Age                                 | -1.471                    | <.001    | -1.905        | -1.037       |
| Age <sup>2</sup>                    | 0.027                     | .873     | -0.298        | 0.351        |
| Age <sup>3</sup>                    | 0.166                     | .302     | -0.146        | 0.478        |
| Depression group                    | -0.008                    | .689     | -0.044        | 0.029        |
| Sex                                 | 0.008                     | .578     | -0.020        | 0.037        |
| Age x Depression group              | -0.342                    | .058     | -0.691        | 0.008        |
| Age <sup>2</sup> x Depression group | 0.169                     | .205     | -0.090        | 0.429        |
| Age <sup>3</sup> x Depression group | -0.038                    | .775     | -0.299        | 0.223        |
| <b>Frontal</b>                      |                           |          |               |              |
| Intercept                           | 2.827                     | <.001    | 2.776         | 2.878        |
| Age                                 | -1.304                    | <.001    | -1.793        | -0.814       |
| Age <sup>2</sup>                    | 0.292                     | .126     | -0.079        | 0.663        |
| Age <sup>3</sup>                    | 0.308                     | .095     | -0.050        | 0.667        |
| Depression group                    | -0.012                    | .537     | -0.049        | 0.026        |
| Sex                                 | 0.016                     | .286     | -0.013        | 0.045        |
| Age x Depression group              | -0.573                    | .005     | -0.967        | -0.179       |
| Age <sup>2</sup> x Depression group | -0.043                    | .778     | -0.340        | 0.254        |
| Age <sup>3</sup> x Depression group | -0.097                    | .527     | -0.397        | 0.202        |
| <b>Parietal</b>                     |                           |          |               |              |
| intercept                           | 2.560                     | <.001    | 2.510         | 2.610        |
| Age                                 | -1.471                    | <.001    | -1.901        | -1.042       |
| Age <sup>2</sup>                    | 0.120                     | .464     | -0.200        | 0.440        |
| Age <sup>3</sup>                    | 0.193                     | .224     | -0.115        | 0.501        |
| Depression group                    | -0.028                    | .142     | -0.065        | 0.009        |
| Sex                                 | 0.014                     | .352     | -0.015        | 0.042        |
| Age x Depression group              | -0.372                    | .037     | -0.718        | -0.027       |
| Age <sup>2</sup> x Depression group | 0.143                     | .278     | -0.113        | 0.399        |
| Age <sup>3</sup> x Depression group | -0.070                    | .594     | -0.327        | 0.187        |
| <b>Occipital</b>                    |                           |          |               |              |
| Intercept                           | 2.103                     | <.001    | 2.057         | 2.149        |
| Age                                 | -0.900                    | <.001    | -1.289        | -0.510       |
| Depression group                    | -0.038                    | .030     | -0.072        | -0.004       |
| Sex                                 | 0.008                     | .543     | -0.018        | 0.035        |
| Age x Depression group              | -0.138                    | .388     | -0.451        | 0.175        |

– Supplement –

Bos, M.G.N., Peters, S., van de Kamp, F.C., Crone, E.A., & Tamnes, C.K. *Emerging depression in adolescence coincides with accelerated cortical thinning.*

---

| Cingulate                           |        |       |        |        |
|-------------------------------------|--------|-------|--------|--------|
| Intercept                           | 2.935  | <.001 | 2.879  | 2.990  |
| Age                                 | -2.094 | <.001 | -2.456 | -1.732 |
| Age <sup>2</sup>                    | 0.232  | .087  | -0.031 | 0.495  |
| Age <sup>3</sup>                    | 0.181  | .163  | -0.071 | 0.433  |
| Depression group                    | 0.002  | .926  | -0.039 | 0.043  |
| Sex                                 | -0.022 | .184  | -0.053 | 0.010  |
| Age x Depression group              | -0.165 | .270  | -0.457 | 0.126  |
| Age <sup>2</sup> x Depression group | -0.021 | .843  | -0.231 | 0.189  |
| Age <sup>3</sup> x Depression group | -0.046 | .667  | -0.257 | 0.164  |

---

– Supplement –

Bos, M.G.N., Peters, S., van de Kamp, F.C., Crone, E.A., & Tamnes, C.K. *Emerging depression in adolescence coincides with accelerated cortical thinning.*

**Supplementary Table 3.** Model parameters for the best fitting model for the five lobes of cortical surface area. CI = confidence interval.

| <b>Factors</b>                      | <b>Cortical Thickness</b> |          |               |              |
|-------------------------------------|---------------------------|----------|---------------|--------------|
|                                     | <b>B</b>                  | <b>p</b> | <b>95% CI</b> |              |
|                                     |                           |          | <b>lower</b>  | <b>upper</b> |
| <b>Temporal</b>                     |                           |          |               |              |
| Intercept                           | 34871.810                 | <.001    | 33162.591     | 36581.030    |
| Age                                 | -9748.510                 | <.001    | -13219.808    | -6277.212    |
| Age <sup>2</sup>                    | -423.170                  | .736     | -2870.646     | 2024.315     |
| Age <sup>3</sup>                    | 3776.680                  | .002     | 1444.213      | 6109.145     |
| Depression group                    | 237.910                   | .711     | -1013.808     | 1489.622     |
| Sex                                 | 3750.960                  | <.001    | 2774.454      | 4727.476     |
| Age x Depression group              | -3210.140                 | .026     | -6006.120     | -414.166     |
| Age <sup>2</sup> x Depression group | 646.200                   | .519     | -1302.794     | 2595.199     |
| Age <sup>3</sup> x Depression group | -1290.600                 | .197     | -3233.781     | 652.573      |
| <b>Frontal</b>                      |                           |          |               |              |
| Intercept                           | 58765.450                 | <.001    | 55848.034     | 61682.876    |
| Age                                 | -23264.590                | <.001    | -27980.628    | -18548.553   |
| Age <sup>2</sup>                    | -1481.420                 | .385     | -4802.722     | 1839.874     |
| Age <sup>3</sup>                    | 6821.890                  | <.001    | 3657.283      | 9986.488     |
| Depression group                    | 1380.890                  | .208     | -755.414      | 3517.203     |
| Sex                                 | 6806.280                  | <.001    | 5139.431      | 8473.123     |
| Age x Depression group              | -487.340                  | .803     | -4285.934     | 3311.257     |
| Age <sup>2</sup> x Depression group | -265.190                  | .845     | -2909.815     | 2379.433     |
| Age <sup>3</sup> x Depression group | -2724.670                 | .045     | -5361.012     | -88.334      |
| <b>Parietal</b>                     |                           |          |               |              |
| Intercept                           | 42109.220                 | <.001    | 40065.168     | 44153.266    |
| Age                                 | -26462.920                | <.001    | -30772.811    | -22153.031   |
| Age <sup>2</sup>                    | 2200.860                  | .159     | -838.615      | 5240.344     |
| Age <sup>3</sup>                    | 5586.680                  | <.001    | 2689.914      | 8483.445     |
| Depression group                    | 1036.630                  | .178     | -460.328      | 2533.578     |
| Sex                                 | 5112.800                  | <.001    | 3945.006      | 6280.598     |
| Age x Depression group              | 651.160                   | .715     | -2820.260     | 4122.578     |
| Age <sup>2</sup> x Depression group | 655.290                   | .598     | -1765.178     | 3075.750     |
| Age <sup>3</sup> x Depression group | -2812.840                 | .024     | -5226.150     | -399.524     |
| <b>Occipital</b>                    |                           |          |               |              |
| Intercept                           | 22293.664                 | <.001    | 21132.439     | 23454.890    |
| Age                                 | -8373.765                 | <.001    | -12079.383    | -4668.148    |
| Age <sup>2</sup>                    | 1133.645                  | .401     | -1491.127     | 3758.417     |
| Age <sup>3</sup>                    | 4040.312                  | .002     | 1536.902      | 6543.723     |
| Depression group                    | 438.190                   | .316     | -412.546      | 1288.927     |

– Supplement –

Bos, M.G.N., Peters, S., van de Kamp, F.C., Crone, E.A., & Tamnes, C.K. *Emerging depression in adolescence coincides with accelerated cortical thinning.*

---

|                                     |           |       |           |           |
|-------------------------------------|-----------|-------|-----------|-----------|
| Sex                                 | 2842.089  | <.001 | 2178.761  | 3505.418  |
| Age x Depression group              | -1910.866 | .213  | -4895.462 | 1073.731  |
| Age <sup>2</sup> x Depression group | 290.966   | .786  | -1799.908 | 2381.840  |
| Age <sup>3</sup> x Depression group | -2155.049 | .045  | -4240.933 | -69.165   |
| Cingulate                           |           |       |           |           |
| Intercept                           | 7942.049  | <.001 | 7418.808  | 8465.290  |
| Age                                 | -2727.167 | <.001 | -3540.196 | -1914.138 |
| Age <sup>2</sup>                    | 143.112   | .627  | -429.383  | 715.606   |
| Age <sup>3</sup>                    | 642.643   | .022  | 97.172    | 1188.114  |
| Depression group                    | 180.765   | .358  | -202.379  | 563.908   |
| Sex                                 | 1074.246  | <.001 | 775.295   | 1373.197  |
| Age x Depression group              | 133.670   | .691  | -521.196  | 788.536   |
| Age <sup>2</sup> x Depression group | 101.149   | .666  | -354.702  | 557.000   |
| Age <sup>3</sup> x Depression group | -324.213  | .166  | -778.627  | 130.201   |

---

– Supplement –

Bos, M.G.N., Peters, S., van de Kamp, F.C., Crone, E.A., & Tamnes, C.K. *Emerging depression in adolescence coincides with accelerated cortical thinning.*

**Supplementary Table 4.** BIC values for best age model controlling for sex and the model including Sex interaction terms for thickness of frontal, parietal, and occipital lobe and surface area of temporal, frontal, parietal, and occipital lobes.

|                           | Models                     |                            |
|---------------------------|----------------------------|----------------------------|
|                           | Best Age model * BDI + Sex | Best Age model * BDI * Sex |
| <b>Cortical Thickness</b> |                            |                            |
| Frontal                   | -1188                      | -1145                      |
| Parietal                  | -1283                      | -1250                      |
| Occipital                 | -1420                      | -1402                      |
| <b>Surface area</b>       |                            |                            |
| Temporal                  | 8643                       | 8683                       |
| Frontal                   | 9076                       | 9111                       |
| Parietal                  | 8829                       | 8867                       |
| Occipital                 | 8526                       | 8565                       |

**Supplementary Table 5.** Model parameters for the best fitting model for hippocampal and amygdala volume. CI = confidence interval.

| Factors                             | Subcortical volumes |       |           |          |
|-------------------------------------|---------------------|-------|-----------|----------|
|                                     | B                   | p     | 95% CI    |          |
| Hippocampus                         |                     |       | lower     | upper    |
| Intercept                           | 4889.008            | <.001 | 4781.924  | 4996.093 |
| Age                                 | 401.840             | .149  | -141.363  | 945.044  |
| Depression group                    | -47.114             | .593  | -220.184  | 125.956  |
| Sex                                 | 346.237             | <.001 | 205.081   | 487.393  |
| Age x Depression group              | -1001.020           | .102  | -2194.200 | 192.162  |
| Amygdala                            |                     |       |           |          |
| Intercept                           | 1488.817            | <.001 | 1451.552  | 1526.082 |
| Age                                 | -149.990            | .070  | -310.803  | 10.823   |
| Age <sup>2</sup>                    | -158.099            | .009  | -275.321  | -40.877  |
| Depression group                    | -40.983             | .196  | -102.759  | 20.793   |
| Sex                                 | 181.432             | <.001 | 131.971   | 230.893  |
| Age x Depression group              | 31.661              | .864  | -328.683  | 392.004  |
| Age <sup>2</sup> x Depression group | 137.130             | .294  | -117.879  | 392.140  |

– Supplement –

Bos, M.G.N., Peters, S., van de Kamp, F.C., Crone, E.A., & Tamnes, C.K. *Emerging depression in adolescence coincides with accelerated cortical thinning.*

**Supplementary Figure 1** Developmental trajectories for cortical thickness of the parietal lobe (A), and Occipital lobe (B). Mean cortical thickness in mm (y-axis) by age in years (x-axis) is shown for participants in the high depression group (red) and low depression group (grey) based on the optimal fitting model. The shade represents 95% confidence interval. Individual participants are represented by individual lines. Participants measured once are represented by dots.

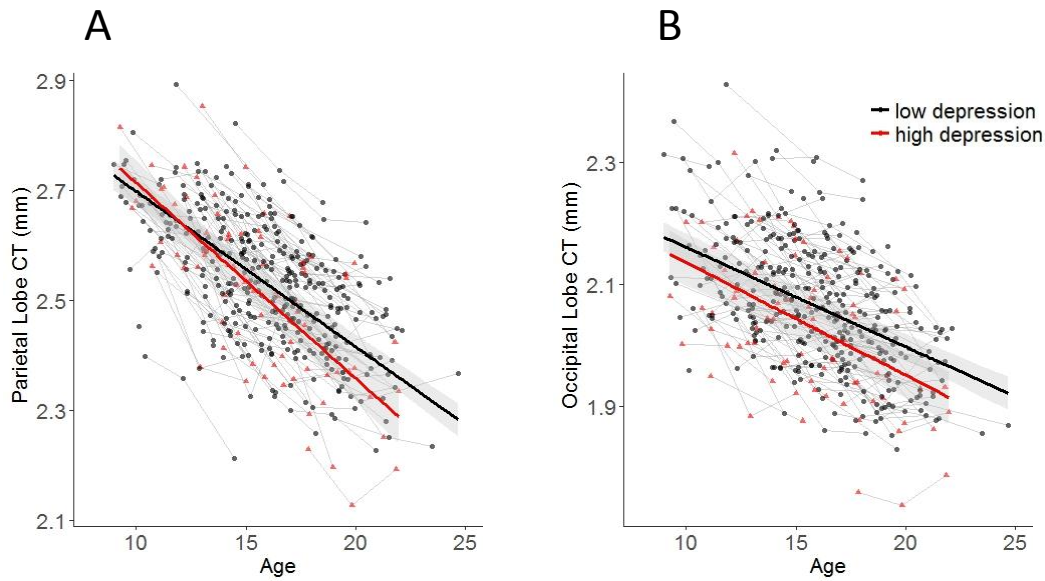



– Supplement –

Bos, M.G.N., Peters, S., van de Kamp, F.C., Crone, E.A., & Tamnes, C.K. *Emerging depression in adolescence coincides with accelerated cortical thinning.*

**Supplementary Figure 2.** Developmental trajectories for cortical surface area of the parietal lobe (A), temporal lobe (B), frontal lobe (C), Occipital lobe (D). Mean surface area in mm<sup>2</sup> (y-axis) by age in years (x-axis) is shown for participants in the high depression group (red) and low depression group (grey) based on the optimal fitting model. The shade represents 95% confidence interval. Individual participants are represented by individual lines. Participants measured once are represented by dots.

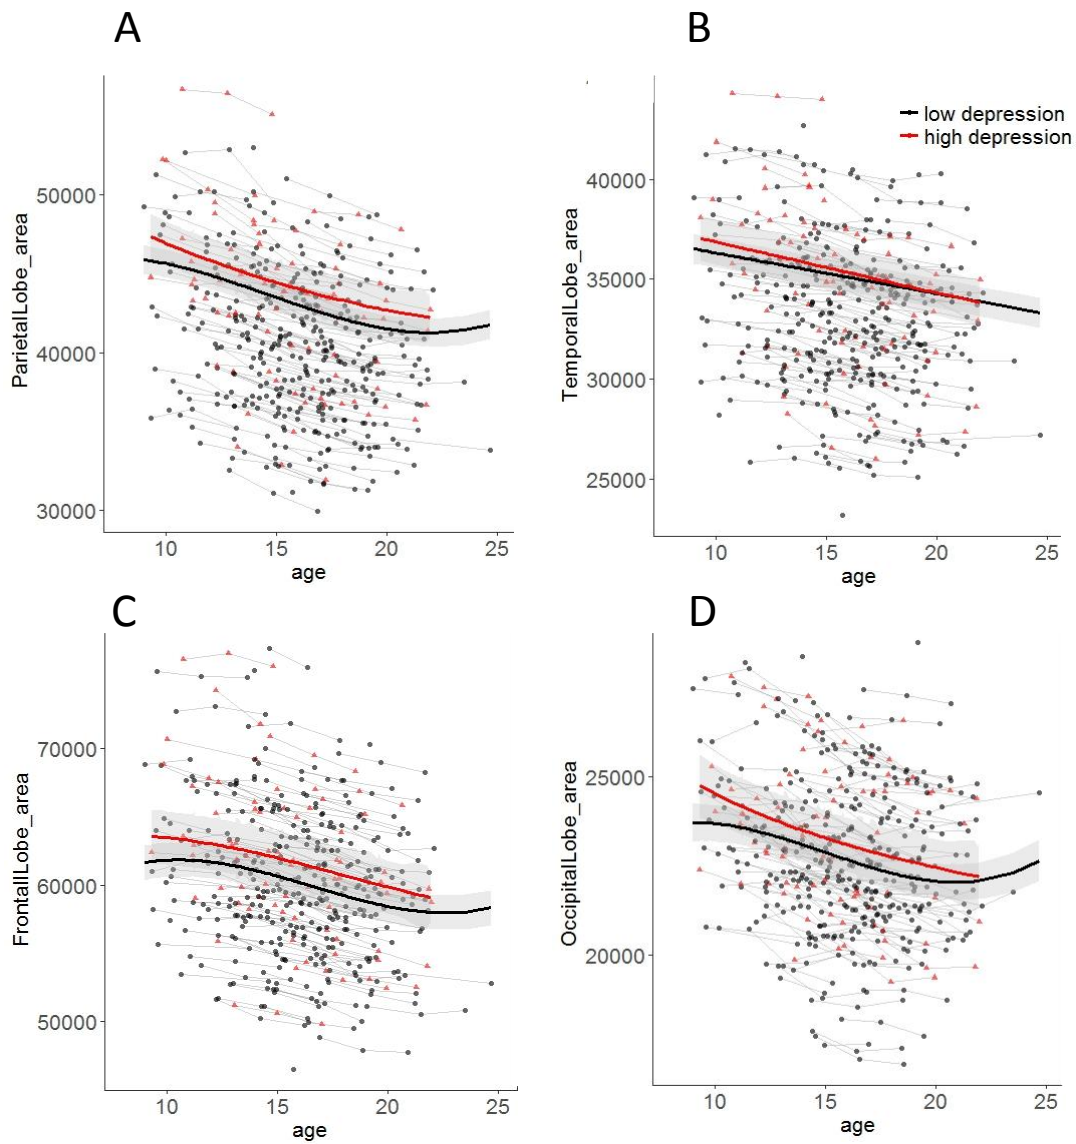

– Supplement –

Bos, M.G.N., Peters, S., van de Kamp, F.C., Crone, E.A., & Tamnes, C.K. *Emerging depression in adolescence coincides with accelerated cortical thinning.*

---

**Supplementary References:**

Dale, A. M., Fischl, B., & Sereno, M. I. (1999). Cortical surface-based analysis: I. Segmentation and surface reconstruction. *NeuroImage*, *9*(2), 179-194.

Fischl, B., Salat, D. H., Busa, E., Albert, M., Dieterich, M., Haselgrove, C., . . . Klaveness, S. (2002). Whole brain segmentation: automated labeling of neuroanatomical structures in the human brain. *Neuron*, *33*(3), 341-355.

Fischl, B., Sereno, M. I., & Dale, A. M. (1999). Cortical surface-based analysis: II: inflation, flattening, and a surface-based coordinate system. *NeuroImage*, *9*(2), 195-207.

Reuter, M., Rosas, H. D., & Fischl, B. (2010). Highly accurate inverse consistent registration: a robust approach. *NeuroImage*, *53*(4), 1181-1196.

Reuter, M., Schmansky, N. J., Rosas, H. D., & Fischl, B. (2012). Within-subject template estimation for unbiased longitudinal image analysis. *NeuroImage*, *61*(4), 1402-1418.

Schwarz, G. (1978). Estimating the dimension of a model. *The annals of statistics*, *6*(2), 461-464.
